# Supplementary material for: Contribution of Proteins to the Latin American Diet: Results of the ELANS Study
Source: MDPI journal article supplement (doi:10.3390/nu15030669), 2023-01-28
Supplement: s1 [file s1]

## **Supplementary material**

### **Contribution of proteins to the Latin American diet: Results of the ELANS study**

Marianella Herrera-Cuenca, Martha Cecilia Yépez García, Lilia Yadira Cortés Sanabria, Pablo Hernández, Yaritza Sifontes, Guillermo Ramírez, Maura Vásquez, Georgina Gómez, María Reyna Liria-Domínguez, Attilio Rigotti, Mauro Fisberg, Irina Kovaslkys, Maritza Landaeta-Jiménez.

## **Table of contents**

**Supplemental Table S1.** Mean and 95% CI for animal and plant protein intake by ELANS countries.

**Supplemental Table S2.** Mean daily protein intake (g/day) by socio-economic class and educational level, by protein source, by and country.

**Supplemental Table S3.** Mean daily protein intake (g/day) by socio-economic level and educational level, by protein source, and by ELANS countries.

**Supplemental Table S1.** Mean and 95% CI for animal and plant protein intake by ELANS countries.

| Country    | n    | Animal |        |      | Plant |        |      |
|------------|------|--------|--------|------|-------|--------|------|
|            |      | Mean   | 95% CI |      | Mean  | 95% CI |      |
| ELANS      | 9218 | 51.3   | 51.0   | 51.7 | 27.1  | 26.9   | 27.2 |
| Argentina  | 1266 | 59.7   | 58.7   | 60.7 | 26.2  | 25.7   | 26.7 |
| Brazil     | 2000 | 54.2   | 53.3   | 55.1 | 25.0  | 24.6   | 25.3 |
| Chile      | 879  | 38.9   | 38.1   | 39.8 | 28.6  | 28.0   | 29.3 |
| Colombia   | 1230 | 53.9   | 53.0   | 54.7 | 26.5  | 26.1   | 26.8 |
| Costa Rica | 798  | 38.8   | 37.7   | 39.9 | 29.2  | 28.5   | 29.9 |
| Ecuador    | 800  | 56.5   | 55.3   | 57.6 | 29.2  | 28.7   | 29.7 |
| Peru       | 1113 | 46.1   | 45.3   | 47.0 | 31.9  | 31.4   | 32.4 |
| Venezuela  | 1132 | 54.2   | 53.4   | 55.1 | 23.4  | 23.0   | 23.9 |

**Supplemental Table S2.** Mean daily protein intake (g/day) by sex and age, by protein source, and by ELANS countries.

|                  | Country    | n    | Total group |      | Sex (g/d) |      |        |      | Age group (g/d) |      |           |      |           |      |         |      |
|------------------|------------|------|-------------|------|-----------|------|--------|------|-----------------|------|-----------|------|-----------|------|---------|------|
|                  |            |      | (g/d)       |      | Male      |      | Female |      | 15 - 19.9       |      | 20 - 34.9 |      | 35 - 49.9 |      | 50 - 65 |      |
|                  |            |      | Mean        | SD   | Mean      | SD   | Mean   | SD   | Mean            | SD   | Mean      | SD   | Mean      | SD   | Mean    | SD   |
| TOTAL<br>SOURCE  | ELANS      | 9218 | 78.8        | 23.1 | 86.7      | 23.8 | 71.5   | 19.8 | 80.6            | 22.3 | 81.6      | 23.7 | 77.9      | 23.3 | 73.7    | 21.3 |
|                  | Argentina  | 1266 | 85.9        | 23.6 | 95.9      | 24.1 | 77.7   | 19.6 | 91.3            | 22.3 | 86.1      | 23.8 | 85.8      | 24.4 | 83.0    | 22.2 |
|                  | Brazil     | 2000 | 79.2        | 26.7 | 89.1      | 28.3 | 70.5   | 21.8 | 85.1            | 27.6 | 82.2      | 28.4 | 78.0      | 25.8 | 72.3    | 22.5 |
|                  | Chile      | 879  | 67.5        | 19.0 | 75.3      | 20.4 | 60.2   | 14.2 | 65.5            | 15.3 | 69.5      | 18.8 | 68.7      | 22.6 | 64.4    | 15.8 |
|                  | Colombia   | 1230 | 80.4        | 19.9 | 85.9      | 20.1 | 75.0   | 18.3 | 82.0            | 19.2 | 82.3      | 19.3 | 79.5      | 19.3 | 77.7    | 21.6 |
|                  | Costa Rica | 798  | 68.0        | 22.5 | 77.3      | 23.4 | 59.0   | 17.2 | 67.4            | 17.7 | 74.0      | 24.1 | 66.0      | 22.4 | 59.6    | 19.2 |
|                  | Ecuador    | 800  | 87.4        | 21.6 | 94.7      | 21.1 | 80.2   | 19.6 | 85.7            | 19.3 | 91.8      | 21.0 | 85.9      | 22.5 | 81.1    | 21.6 |
|                  | Perú       | 1113 | 79.5        | 20.0 | 86.7      | 20.2 | 73.1   | 17.6 | 79.7            | 19.6 | 82.4      | 21.1 | 78.8      | 19.5 | 73.6    | 17.1 |
|                  | Venezuela  | 1132 | 77.7        | 19.4 | 83.7      | 20.0 | 72.1   | 16.9 | 80.7            | 18.3 | 80.5      | 20.6 | 76.0      | 18.9 | 72.0    | 16.4 |
| ANIMAL<br>SOURCE | ELANS      | 9218 | 51.3        | 18.2 | 55.8      | 19.2 | 47.2   | 16.2 | 51.9            | 18.3 | 53.3      | 18.5 | 50.8      | 18.0 | 48.1    | 17.1 |
|                  | Argentina  | 1266 | 59.7        | 18.3 | 66.2      | 18.8 | 54.3   | 15.9 | 62.4            | 18.9 | 59.8      | 18.3 | 59.8      | 18.8 | 57.9    | 17.2 |
|                  | Brazil     | 2000 | 54.2        | 20.7 | 60.0      | 22.3 | 48.9   | 17.6 | 57.6            | 21.8 | 55.9      | 22.0 | 53.6      | 19.9 | 50.0    | 18.0 |
|                  | Chile      | 879  | 38.9        | 13.1 | 42.6      | 14.3 | 35.6   | 10.9 | 37.4            | 10.2 | 39.6      | 13.3 | 40.2      | 15.0 | 37.2    | 11.4 |
|                  | Colombia   | 1230 | 53.9        | 15.3 | 57.3      | 15.5 | 50.6   | 14.4 | 54.5            | 14.1 | 55.8      | 15.2 | 53.0      | 14.9 | 51.8    | 16.1 |
|                  | Costa Rica | 798  | 38.8        | 15.2 | 42.9      | 16.3 | 34.8   | 12.8 | 38.8            | 13.7 | 43.0      | 16.2 | 36.9      | 14.0 | 33.2    | 13.7 |
|                  | Ecuador    | 800  | 56.5        | 16.3 | 60.8      | 15.9 | 52.2   | 15.6 | 55.2            | 16.0 | 59.7      | 16.2 | 55.3      | 15.9 | 52.0    | 16.3 |
|                  | Perú       | 1113 | 46.1        | 14.5 | 49.3      | 15.3 | 43.3   | 13.2 | 45.1            | 15.2 | 48.5      | 15.0 | 45.3      | 13.9 | 42.5    | 12.8 |
|                  | Venezuela  | 1132 | 54.2        | 15.1 | 58.3      | 15.7 | 50.4   | 13.5 | 56.1            | 13.6 | 56.8      | 16.1 | 52.6      | 14.8 | 49.7    | 13.1 |
| PLANT<br>SOURCE  | ELANS      | 9218 | 27.1        | 8.7  | 30.0      | 9.2  | 24.4   | 7.2  | 28.3            | 8.6  | 27.6      | 8.9  | 26.8      | 8.8  | 25.5    | 8.0  |
|                  | Argentina  | 1266 | 26.2        | 8.4  | 29.3      | 8.9  | 23.6   | 7.0  | 28.5            | 9.0  | 26.3      | 8.8  | 25.9      | 8.3  | 25.2    | 7.6  |
|                  | Brazil     | 2000 | 25.0        | 8.7  | 28.5      | 9.2  | 21.9   | 6.9  | 27.1            | 8.9  | 25.9      | 9.2  | 24.5      | 8.6  | 22.6    | 7.3  |
|                  | Chile      | 879  | 28.6        | 9.4  | 32.3      | 9.9  | 25.2   | 7.3  | 28.4            | 8.2  | 29.5      | 9.9  | 28.5      | 9.9  | 27.7    | 8.4  |
|                  | Colombia   | 1230 | 26.5        | 6.9  | 28.1      | 7.2  | 24.9   | 6.2  | 27.3            | 7.1  | 26.4      | 6.6  | 26.6      | 6.8  | 26.0    | 7.4  |
|                  | Costa Rica | 798  | 29.2        | 10.0 | 33.6      | 10.2 | 24.9   | 7.7  | 28.6            | 8.8  | 30.3      | 10.3 | 29.5      | 10.3 | 27.0    | 9.6  |
|                  | Ecuador    | 800  | 29.2        | 7.2  | 31.4      | 7.6  | 27.0   | 6.1  | 29.2            | 6.3  | 30.2      | 7.4  | 28.9      | 7.8  | 27.3    | 6.2  |
|                  | Perú       | 1113 | 31.9        | 8.5  | 35.4      | 8.6  | 28.8   | 7.0  | 33.2            | 9.5  | 32.3      | 8.5  | 31.9      | 8.2  | 30.0    | 7.8  |
|                  | Venezuela  | 1132 | 23.4        | 7.4  | 25.0      | 7.8  | 21.9   | 6.7  | 24.2            | 7.3  | 23.6      | 7.1  | 23.3      | 7.7  | 22.6    | 7.5  |

**Supplemental Table S3.** Mean daily protein intake (g/day) by socio-economic level and educational level, by protein source, and by ELANS countries.

|               | Country    | n    | Total group (g/d) |      | Socioeconomic class (g/d) |      |        |      |      |      | Educational level |      |          |      |              |      |
|---------------|------------|------|-------------------|------|---------------------------|------|--------|------|------|------|-------------------|------|----------|------|--------------|------|
|               |            |      | Mean              | SD   | High                      |      | Middle |      | Low  |      | Basic             |      | Superior |      | Professional |      |
|               |            |      |                   |      | Mean                      | SD   | Mean   | SD   | Mean | SD   | Mean              | SD   | Mean     | SD   | Mean         | SD   |
| TOTAL SOURCE  | ELANS      | 9218 | 78.8              | 23.1 | 80.5                      | 24.1 | 79.3   | 23.2 | 78.1 | 22.8 | 78.1              | 23.1 | 80.3     | 23.3 | 79.6         | 21.7 |
|               | Argentina  | 1266 | 85.9              | 23.6 | 86.3                      | 21.0 | 86.2   | 23.0 | 85.7 | 24.4 | 86.5              | 23.8 | 84.2     | 23.4 | 85.3         | 19.3 |
|               | Brazil     | 2000 | 79.2              | 26.7 | 83.7                      | 30.6 | 80.6   | 26.5 | 77.0 | 26.0 | 77.9              | 26.5 | 81.4     | 27.0 | 79.2         | 24.6 |
|               | Chile      | 879  | 67.5              | 19.0 | 65.9                      | 15.8 | 66.4   | 15.9 | 68.9 | 22.0 | 67.2              | 19.8 | 68.5     | 16.6 | 67.9         | 19.3 |
|               | Colombia   | 1230 | 80.4              | 19.9 | 85.6                      | 16.1 | 82.7   | 18.9 | 78.8 | 20.5 | 79.2              | 20.1 | 82.2     | 20.3 | 83.5         | 17.3 |
|               | Costa Rica | 798  | 68.0              | 22.5 | 71.8                      | 23.8 | 69.0   | 21.9 | 65.0 | 22.6 | 67.7              | 22.9 | 69.0     | 20.7 | 71.8         | 19.5 |
|               | Ecuador    | 800  | 87.4              | 21.6 | 90.3                      | 23.9 | 89.0   | 22.0 | 85.5 | 20.5 | 85.6              | 20.2 | 94.9     | 26.4 | 98.2         | 25.5 |
|               | Peru       | 1113 | 79.5              | 20.0 | 78.8                      | 20.7 | 78.9   | 19.0 | 80.2 | 20.4 | 78.1              | 20.4 | 79.7     | 19.8 | 81.0         | 20.7 |
|               | Venezuela  | 1132 | 77.7              | 19.4 | 83.0                      | 22.3 | 80.1   | 20.6 | 76.9 | 18.8 | 77.2              | 19.1 | 81.5     | 20.5 | 77.7         | 19.5 |
| ANIMAL SOURCE | ELANS      | 9218 | 51.3              | 18.2 | 52.2                      | 18.8 | 51.8   | 18.5 | 50.8 | 17.8 | 50.8              | 18.1 | 52.0     | 18.4 | 52.9         | 17.3 |
|               | Argentina  | 1266 | 59.7              | 18.3 | 59.8                      | 17.1 | 60.3   | 17.9 | 59.1 | 18.8 | 59.9              | 18.4 | 59.0     | 18.1 | 60.1         | 16.7 |
|               | Brazil     | 2000 | 54.2              | 20.7 | 58.9                      | 23.4 | 55.4   | 20.9 | 52.0 | 19.8 | 52.7              | 20.1 | 56.2     | 21.3 | 54.9         | 19.8 |
|               | Chile      | 879  | 38.9              | 13.1 | 39.8                      | 11.9 | 39.1   | 11.7 | 38.6 | 14.5 | 38.1              | 13.3 | 40.6     | 11.8 | 40.3         | 13.9 |
|               | Colombia   | 1230 | 53.9              | 15.3 | 58.8                      | 10.9 | 55.7   | 14.7 | 52.6 | 15.7 | 52.9              | 15.5 | 55.4     | 15.1 | 56.5         | 13.9 |
|               | Costa Rica | 798  | 38.8              | 15.2 | 42.9                      | 15.9 | 39.6   | 14.6 | 35.8 | 15.5 | 38.2              | 15.5 | 40.3     | 13.8 | 44.5         | 12.8 |
|               | Ecuador    | 800  | 56.5              | 16.3 | 60.0                      | 17.9 | 57.4   | 15.8 | 54.8 | 16.1 | 55.2              | 15.5 | 60.8     | 18.7 | 65.3         | 18.5 |
|               | Peru       | 1113 | 46.1              | 14.5 | 46.5                      | 15.1 | 46.0   | 13.4 | 46.1 | 15.0 | 45.1              | 14.6 | 46.2     | 14.4 | 48.0         | 15.2 |
|               | Venezuela  | 1132 | 54.2              | 15.1 | 58.3                      | 16.1 | 56.5   | 15.9 | 53.5 | 14.8 | 53.7              | 14.9 | 57.0     | 15.8 | 54.6         | 15.5 |
| PLANT SOURCE  | ELANS      | 9218 | 27.1              | 8.7  | 27.5                      | 8.5  | 27.1   | 8.5  | 27.0 | 8.9  | 27.0              | 8.8  | 27.7     | 8.8  | 26.1         | 8.1  |
|               | Argentina  | 1266 | 26.2              | 8.4  | 26.7                      | 7.1  | 25.8   | 8.4  | 26.5 | 8.6  | 26.5              | 8.5  | 25.3     | 8.3  | 25.0         | 6.8  |
|               | Brazil     | 2000 | 25.0              | 8.7  | 24.7                      | 8.0  | 24.9   | 8.3  | 25.1 | 9.2  | 25.3              | 9.3  | 25.0     | 8.1  | 24.1         | 8.2  |
|               | Chile      | 879  | 28.6              | 9.4  | 26.1                      | 7.7  | 27.4   | 8.0  | 30.3 | 10.5 | 29.2              | 9.6  | 27.5     | 8.7  | 27.7         | 9.1  |
|               | Colombia   | 1230 | 26.5              | 6.9  | 26.4                      | 7.5  | 26.9   | 6.7  | 26.2 | 7.0  | 26.3              | 6.8  | 26.8     | 7.1  | 26.7         | 7.3  |
|               | Costa Rica | 798  | 29.2              | 10.0 | 28.7                      | 9.4  | 29.3   | 9.9  | 29.2 | 10.6 | 29.4              | 10.3 | 29.1     | 8.5  | 27.1         | 8.5  |
|               | Ecuador    | 800  | 29.2              | 7.2  | 28.4                      | 7.5  | 29.7   | 7.7  | 29.1 | 6.8  | 28.9              | 6.8  | 30.7     | 9.7  | 31.0         | 8.1  |
|               | Peru       | 1113 | 31.9              | 8.5  | 30.7                      | 8.9  | 31.5   | 8.3  | 32.7 | 8.4  | 31.6              | 8.6  | 32.2     | 8.6  | 30.8         | 7.6  |
|               | Venezuela  | 1132 | 23.4              | 7.4  | 24.4                      | 8.0  | 23.6   | 7.0  | 23.3 | 7.4  | 23.4              | 7.6  | 24.4     | 7.3  | 23.0         | 6.6  |
